# Supplementary material for: Wash-resistance of pirimiphos-methyl insecticide treatments of window screens and eave baffles for killing indoor-feeding malaria vector mosquitoes: an experimental hut trial, South East of Zambia
Source: PubMed Central journal article supplement (PMC5899344; doi:10.1186/s12936-018-2309-2), 2018-04-13
Supplement: 12936_2018_2309_MOESM1_ESM.pdf [file 12936_2018_2309_MOESM1_ESM.pdf]

| Experimental design: Field Collections |            | PROJECT CODE (PC):    | WT           | EXPERIMENT NO (EN):   | 1                   | SERIAL NO (SEN):           | 1068        |                                       |                   |                 |                  |                     |             |             |                 |              |                                         |                |                           |                            |       |   |      |                                                 |
|----------------------------------------|------------|-----------------------|--------------|-----------------------|---------------------|----------------------------|-------------|---------------------------------------|-------------------|-----------------|------------------|---------------------|-------------|-------------|-----------------|--------------|-----------------------------------------|----------------|---------------------------|----------------------------|-------|---|------|-------------------------------------------------|
|                                        |            | FORM TYPE (FT):       | ED1          | SITE (SI):            | Chisobe             |                            |             |                                       |                   |                 |                  |                     |             |             |                 |              |                                         |                |                           |                            |       |   |      |                                                 |
|                                        |            | COLLECTION ATTRIBUTES |              |                       |                     |                            |             |                                       |                   |                 |                  |                     |             |             |                 |              |                                         |                |                           |                            |       |   |      |                                                 |
| A                                      | B          | C                     | D            | E                     | F                   | G                          | H           | I                                     | J                 | K               | L                | M                   | N           | O           | P               | Q            | R                                       | S              | T                         | U                          | V     | W | X    |                                                 |
|                                        |            |                       |              |                       |                     |                            |             |                                       |                   |                 |                  |                     |             |             |                 |              |                                         |                |                           |                            |       |   |      | MARK X FOR ALL VARIABLES WHICH MUST BE RECORDED |
| Form Row (FR)                          |            | GENERIC               |              |                       | EXPERIMENT SPECIFIC |                            |             |                                       |                   |                 |                  |                     |             |             |                 |              | Valid Catch (VC): 1=yes, 2=missing data |                | SS Form Serial No. (DSEN) |                            | Notes |   |      |                                                 |
| Date of Collection (DT)                |            | Enumeration area (EA) | Cluster (CR) | Compound or Plot (CP) | Household (HH)      | Structure/Habitat ID (SID) | Method (ME) | Indoor/Outdoor (IN) (1 = in, 2 = out) | Habitat type (HT) | Start Time (ST) | Finish Time (FT) | Holding Period (HP) | Round (RND) | Block (BLK) | House/Hut (SHH) | Station (ST) | Volunteer initials (VI)                 | Treatment (TR) | Experimental Day (DY)     | No. Household Sampled (HS) |       |   |      |                                                 |
| 01                                     | 15/17/2017 | Chisobe               |              |                       |                     |                            | 5           | 1                                     |                   | 19              | 7                |                     |             |             | A               |              | GC/TM                                   | U1 + IRS       | 1                         |                            | 1     |   | 0005 |                                                 |
| 02                                     | 15/17/2017 | Chisobe               |              |                       |                     |                            | 10          | 1                                     |                   | 19              | 7                |                     |             |             | A               |              | GC/TM                                   | U1 + IRS       | 1                         |                            |       |   | 0006 |                                                 |
| 03                                     | 15/17/2017 | Chisobe               |              |                       |                     |                            | 11          | 1                                     |                   | 19              | 7                |                     |             |             | A               |              | GC/TM                                   | U1 + IRS       | 1                         |                            |       |   | 0007 |                                                 |
| 04                                     | 15/17/2017 | Chisobe               |              |                       |                     |                            | 5           | 1                                     |                   | 19              | 7                |                     |             |             | B               |              | RZ/BT                                   | U3             | 1                         |                            |       |   | 0008 |                                                 |
| 05                                     | 15/17/2017 | Chisobe               |              |                       |                     |                            | 10          | 1                                     |                   | 19              | 7                |                     |             |             | B               |              | RZ/BT                                   | U3             | 1                         |                            |       |   | 0009 |                                                 |
| 06                                     | 15/17/2017 | Chisobe               |              |                       |                     |                            | 11          | 1                                     |                   | 19              | 7                |                     |             |             | B               |              | RZ/BT                                   | U3             | 1                         |                            |       |   | 0010 |                                                 |
| 07                                     | 15/17/2017 | Chisobe               |              |                       |                     |                            | 5           | 1                                     |                   | 19              | 7                |                     |             |             | C               |              | MZ/OZ                                   | U2 + IRS       | 1                         |                            |       |   | 0012 |                                                 |
| 08                                     | 15/17/2017 | Chisobe               |              |                       |                     |                            | 10          | 1                                     |                   | 19              | 7                |                     |             |             | C               |              | MZ/OZ                                   | U2 + IRS       | 1                         |                            |       |   | 0013 |                                                 |
| 09                                     | 15/17/2017 | Chisobe               |              |                       |                     |                            | 11          | 1                                     |                   | 19              | 7                |                     |             |             | C               |              | MZ/OZ                                   | U2 + IRS       | 1                         |                            |       |   | 0014 |                                                 |
| 10                                     | 15/17/2017 | Chisobe               |              |                       |                     |                            | 5           | 1                                     |                   | 19              | 7                |                     |             |             | D               |              | BN/KN                                   | T1             | 1                         |                            |       |   | 0015 |                                                 |
| 11                                     | 15/17/2017 | Chisobe               |              |                       |                     |                            | 10          | 1                                     |                   | 19              | 7                |                     |             |             | D               |              | BN/KN                                   | T1             | 1                         |                            |       |   | 0016 |                                                 |
| 12                                     | 15/17/2017 | Chisobe               |              |                       |                     |                            | 11          | 1                                     |                   | 19              | 7                |                     |             |             | D               |              | BN/KN                                   | T1             | 1                         |                            |       |   | 0017 |                                                 |
| 13                                     |            |                       |              |                       |                     |                            |             |                                       |                   |                 |                  |                     |             |             |                 |              |                                         |                |                           |                            |       |   |      |                                                 |
| 14                                     |            |                       |              |                       |                     |                            |             |                                       |                   |                 |                  |                     |             |             |                 |              |                                         |                |                           |                            |       |   |      |                                                 |
| 15                                     |            |                       |              |                       |                     |                            |             |                                       |                   |                 |                  |                     |             |             |                 |              |                                         |                |                           |                            |       |   |      |                                                 |
| 16                                     |            |                       |              |                       |                     |                            |             |                                       |                   |                 |                  |                     |             |             |                 |              |                                         |                |                           |                            |       |   |      |                                                 |
| 17                                     |            |                       |              |                       |                     |                            |             |                                       |                   |                 |                  |                     |             |             |                 |              |                                         |                |                           |                            |       |   |      |                                                 |
| 18                                     |            |                       |              |                       |                     |                            |             |                                       |                   |                 |                  |                     |             |             |                 |              |                                         |                |                           |                            |       |   |      |                                                 |
| 19                                     |            |                       |              |                       |                     |                            |             |                                       |                   |                 |                  |                     |             |             |                 |              |                                         |                |                           |                            |       |   |      |                                                 |
| 20                                     |            |                       |              |                       |                     |                            |             |                                       |                   |                 |                  |                     |             |             |                 |              |                                         |                |                           |                            |       |   |      |                                                 |

EXPERIMENT SUPERVISORS INITIALS (ESI): D.C  
 RESPONSIBLE SCIENTISTS INITIALS (RSI): D.C  
 AND SIGNATURE:  
 AND SIGNATURE:

Method (ME): 01 = HL/C; 02 = TT; 03 = CDC; LT; 04 = Resting box; 05 = Aspirator resting sites; 06 = Floor; 07 = Entry window; 08 = Entry eave; 09 = Entry; 10 = Exit window; 11 = Exit eave; 12 = Exit; 13 = PSC; 14 = Dip; 15 = Substrate; 16 = Emergence trap; 17 = Ovttrap  
 Habitat type (HT): 01 = Puddles & tire tracks; 02 = Swampy areas; 03 = Mangrove swamp/saltwater marsh; 04 = Drain/ditch; 05 = Construction pit/foundations/man-made hole; 06 = Water storage container; 07 = Rice paddy;  
 08 = Raised bed agriculture; 09 = Other agriculture; 10 = Stream/river bed; 11 = Pond; 12 = Other (describe)





|                                   |                                 |                        |                        |
|-----------------------------------|---------------------------------|------------------------|------------------------|
| Sample Sorting: Batch and/or Pool | Project Code (PC): Avecnet WP2  | Experiment No. (EN): 1 | SERIAL NO. (SEN): 0007 |
| FORM TYPE (FT): SS3               | ED Form Serial No. (SSEN): 1068 | ED Form Row (SFR): 3   |                        |

| Form Row (FR)                                                       | Sorting/Observation Variables                   |            |                                |                              |             |            |                  |                  |                |                     |                |                |                |                    | No. Observed (N) | Sample Label Code (SLC) | Sample type variables |                              |                              |                              |                              |                              |                              |                              |                  |
|---------------------------------------------------------------------|-------------------------------------------------|------------|--------------------------------|------------------------------|-------------|------------|------------------|------------------|----------------|---------------------|----------------|----------------|----------------|--------------------|------------------|-------------------------|-----------------------|------------------------------|------------------------------|------------------------------|------------------------------|------------------------------|------------------------------|------------------------------|------------------|
|                                                                     | Dead (DD) (1 = yes, 2 = no)                     | Taxon (TX) | Sex and Abdominal Status (SAS) | Mated (MT) (1 = yes, 2 = no) | Choice (CH) | Label (LA) | Finish Date (FD) | Finish Time (FT) | Body Form (BF) | Holding period (HP) | Other 5 (OTH5) | Other 6 (OTH6) | Other 7 (OTH7) | No. of Individuals |                  |                         | Number of batches     | Number in Batch 1 (SID = 01) | Number in Batch 2 (SID = 02) | Number in Batch 3 (SID = 03) | Number in Batch 4 (SID = 04) | Number in Batch 5 (SID = 05) | Number in Batch 6 (SID = 06) | Number in Batch 7 (SID = 07) | Number Discarded |
|                                                                     | MARK X FOR ALL VARIABLES WHICH MUST BE RECORDED |            |                                |                              |             |            |                  |                  |                |                     |                |                |                |                    |                  |                         |                       |                              |                              |                              |                              |                              |                              |                              |                  |
|                                                                     | x                                               | x          | x                              |                              |             |            |                  |                  |                |                     |                |                |                |                    |                  |                         |                       |                              |                              |                              |                              |                              |                              |                              |                  |
| Define whether the attribute is categorical (CA) or continuous (CO) |                                                 |            |                                |                              |             |            |                  |                  |                |                     |                |                |                |                    |                  |                         |                       |                              |                              |                              |                              |                              |                              |                              |                  |

|    | A | B | C | D | E | F | G | H | I | J | K  | L | M | N | O | P    | Q | R | S | T | U | V | W | X | Y | Z |
|----|---|---|---|---|---|---|---|---|---|---|----|---|---|---|---|------|---|---|---|---|---|---|---|---|---|---|
|    |   |   |   |   |   |   |   |   |   |   |    |   |   |   |   |      | 1 |   |   |   |   |   |   |   |   |   |
| 01 | 1 | 1 | 2 |   |   |   |   |   | 7 | 1 | 0  |   |   |   |   |      |   |   |   |   |   |   |   |   |   |   |
| 02 | 1 | 1 | 3 |   |   |   |   |   | 7 | 1 | 0  |   |   |   | 9 | 5014 | 1 |   |   |   |   |   |   |   |   |   |
| 03 | 1 | 1 | 4 |   |   |   |   |   | 7 | 1 | 0  |   |   |   |   |      |   |   |   |   |   |   |   |   |   |   |
| 04 | 1 | 1 | 5 |   |   |   |   |   | 7 | 1 | 0  |   |   |   |   |      |   |   |   |   |   |   |   |   |   |   |
| 05 | 1 | 2 | 2 |   |   |   |   |   | 7 | 1 | 0  |   |   |   |   |      |   |   |   |   |   |   |   |   |   |   |
| 06 | 1 | 2 | 3 |   |   |   |   |   | 7 | 1 | 0  |   |   |   |   |      |   |   |   |   |   |   |   |   |   |   |
| 07 | 1 | 2 | 4 |   |   |   |   |   | 7 | 1 | 0  |   |   |   |   |      |   |   |   |   |   |   |   |   |   |   |
| 08 | 1 | 2 | 5 |   |   |   |   |   | 7 | 1 | 0  |   |   |   |   |      |   |   |   |   |   |   |   |   |   |   |
| 09 | 1 | 1 | 2 |   |   |   |   |   | 7 | 1 | 24 |   |   |   |   |      |   |   |   |   |   |   |   |   |   |   |
| 10 | 1 | 1 | 3 |   |   |   |   |   | 7 | 1 | 24 |   |   |   |   |      |   |   |   |   |   |   |   |   |   |   |
| 11 | 1 | 1 | 4 |   |   |   |   |   | 7 | 1 | 24 |   |   |   |   |      |   |   |   |   |   |   |   |   |   |   |
| 12 | 1 | 1 | 5 |   |   |   |   |   | 7 | 1 | 24 |   |   |   |   |      |   |   |   |   |   |   |   |   |   |   |
| 13 | 1 | 2 | 2 |   |   |   |   |   | 7 | 1 | 24 |   |   |   |   |      |   |   |   |   |   |   |   |   |   |   |
| 14 | 1 | 2 | 3 |   |   |   |   |   | 7 | 1 | 24 |   |   |   |   |      |   |   |   |   |   |   |   |   |   |   |
| 15 | 1 | 2 | 4 |   |   |   |   |   | 7 | 1 | 24 |   |   |   |   |      |   |   |   |   |   |   |   |   |   |   |
| 16 | 1 | 2 | 5 |   |   |   |   |   | 7 | 1 | 24 |   |   |   |   |      |   |   |   |   |   |   |   |   |   |   |
| 17 | 2 | 1 | 2 |   |   |   |   |   | 7 | 1 | 24 |   |   |   |   |      |   |   |   |   |   |   |   |   |   |   |
| 18 | 2 | 1 | 3 |   |   |   |   |   | 7 | 1 | 24 |   |   |   |   |      |   |   |   |   |   |   |   |   |   |   |
| 19 | 2 | 1 | 4 |   |   |   |   |   | 7 | 1 | 24 |   |   |   |   |      |   |   |   |   |   |   |   |   |   |   |
| 20 | 2 | 1 | 5 |   |   |   |   |   | 7 | 1 | 24 |   |   |   |   |      |   |   |   |   |   |   |   |   |   |   |
| 21 | 2 | 2 | 2 |   |   |   |   |   | 7 | 1 | 24 |   |   |   |   |      |   |   |   |   |   |   |   |   |   |   |
| 22 | 2 | 2 | 3 |   |   |   |   |   | 7 | 1 | 24 |   |   |   |   |      |   |   |   |   |   |   |   |   |   |   |
| 23 | 2 | 2 | 4 |   |   |   |   |   | 7 | 1 | 24 |   |   |   |   |      |   |   |   |   |   |   |   |   |   |   |
| 24 | 2 | 2 | 5 |   |   |   |   |   | 7 | 1 | 24 |   |   |   |   |      |   |   |   |   |   |   |   |   |   |   |

Sex and Abdominal Status (SAS): 1 = Total Male; 2 = Unfed; 3 = Partly Fed; 4 = Fed; 5 = Gravid/semigravid; 6 = Total Female  
 Body Part (BP): 01 = Whole Adult; 13 = Eggs; 16 = Larvae; 17 = L1; 18 = L2; 19 = L3; 20 = L4; 21 = L1&L2; 22 = L3&L4; 23 = Pupae

Labelling details: First line: FT.SEN.FR  
 Second line: SLC.BP.ST.SID

|                                   |                                                                     |            |                                 |                              |             |                        |                  |                  |                        |                     |                  |                         |                       |                |                |                    |                   |                              |                              |                              |                              |                              |                              |                              |                  |  |
|-----------------------------------|---------------------------------------------------------------------|------------|---------------------------------|------------------------------|-------------|------------------------|------------------|------------------|------------------------|---------------------|------------------|-------------------------|-----------------------|----------------|----------------|--------------------|-------------------|------------------------------|------------------------------|------------------------------|------------------------------|------------------------------|------------------------------|------------------------------|------------------|--|
| Sample Sorting: Batch and/or Pool |                                                                     |            | Project Code (PC): Avecnet WP2  |                              |             | Experiment No. (EN): 1 |                  |                  | SERIAL NO. (SEN): 0008 |                     |                  |                         |                       |                |                |                    |                   |                              |                              |                              |                              |                              |                              |                              |                  |  |
| FORM TYPE (FT): SS3               |                                                                     |            | ED Form Serial No. (SSEN): 1068 |                              |             | ED Form Row (SFR): 4   |                  |                  |                        |                     |                  |                         |                       |                |                |                    |                   |                              |                              |                              |                              |                              |                              |                              |                  |  |
| Form Row (FR)                     | Sorting/Observation Variables                                       |            |                                 |                              |             |                        |                  |                  |                        |                     | No. Observed (N) | Sample Label Code (SLC) | Sample type variables |                |                |                    |                   |                              |                              |                              |                              |                              |                              |                              |                  |  |
|                                   | Dead (DD) (1 = yes, 2 = no)                                         | Taxon (TX) | Sex and Abdominal Status (SAS)  | Mated (MT) (1 = yes, 2 = no) | Choice (CH) | Label (LA)             | Finish Date (FD) | Finish Time (FT) | Body Form (BF)         | Holding period (HP) |                  |                         | Other 5 (OTH5)        | Other 6 (OTH6) | Other 7 (OTH7) | No. of Individuals | Number of batches | Number in Batch 1 (SID = 01) | Number in Batch 2 (SID = 02) | Number in Batch 3 (SID = 03) | Number in Batch 4 (SID = 04) | Number in Batch 5 (SID = 05) | Number in Batch 6 (SID = 06) | Number in Batch 7 (SID = 07) | Number Discarded |  |
|                                   | MARK X FOR ALL VARIABLES WHICH MUST BE RECORDED                     |            |                                 |                              |             |                        |                  |                  |                        |                     |                  |                         |                       |                |                |                    |                   |                              |                              |                              |                              |                              |                              |                              |                  |  |
|                                   | x                                                                   | x          | x                               |                              |             |                        |                  |                  |                        |                     |                  |                         |                       |                |                |                    |                   |                              |                              |                              |                              |                              |                              |                              |                  |  |
|                                   | Define whether the attribute is categorical (CA) or continuous (CO) |            |                                 |                              |             |                        |                  |                  |                        |                     |                  |                         |                       |                |                |                    |                   |                              |                              |                              |                              |                              |                              |                              |                  |  |
| A                                 | B                                                                   | C          | D                               | E                            | F           | G                      | H                | I                | J                      | K                   | L                | M                       | N                     | O              | P              | Q                  | R                 | S                            | T                            | U                            | V                            | W                            | X                            | Y                            | Z                |  |
|                                   |                                                                     |            |                                 |                              |             |                        |                  |                  |                        |                     |                  |                         |                       |                |                | 1                  |                   | 2                            | 2                            | 2                            | 2                            | 2                            | 2                            | 2                            | 2                |  |
| 01                                | 1                                                                   | 1          | 2                               |                              |             |                        |                  | 7                | 1                      | 0                   |                  |                         |                       |                |                |                    |                   |                              |                              |                              |                              |                              |                              |                              |                  |  |
| 02                                | 1                                                                   | 1          | 3                               |                              |             |                        |                  | 7                | 1                      | 0                   |                  |                         |                       | 3              | 5015           | 1                  |                   |                              |                              |                              |                              |                              |                              |                              |                  |  |
| 03                                | 1                                                                   | 1          | 4                               |                              |             |                        |                  | 7                | 1                      | 0                   |                  |                         |                       |                |                |                    |                   |                              |                              |                              |                              |                              |                              |                              |                  |  |
| 04                                | 1                                                                   | 1          | 5                               |                              |             |                        |                  | 7                | 1                      | 0                   |                  |                         |                       |                |                |                    |                   |                              |                              |                              |                              |                              |                              |                              |                  |  |
| 05                                | 1                                                                   | 2          | 2                               |                              |             |                        |                  | 7                | 1                      | 0                   |                  |                         |                       |                |                |                    |                   |                              |                              |                              |                              |                              |                              |                              |                  |  |
| 06                                | 1                                                                   | 2          | 3                               |                              |             |                        |                  | 7                | 1                      | 0                   |                  |                         |                       |                |                |                    |                   |                              |                              |                              |                              |                              |                              |                              |                  |  |
| 07                                | 1                                                                   | 2          | 4                               |                              |             |                        |                  | 7                | 1                      | 0                   |                  |                         |                       |                |                |                    |                   |                              |                              |                              |                              |                              |                              |                              |                  |  |
| 08                                | 1                                                                   | 2          | 5                               |                              |             |                        |                  | 7                | 1                      | 0                   |                  |                         |                       |                |                |                    |                   |                              |                              |                              |                              |                              |                              |                              |                  |  |
| 09                                | 1                                                                   | 1          | 2                               |                              |             |                        |                  | 7                | 1                      | 24                  |                  |                         |                       |                |                |                    |                   |                              |                              |                              |                              |                              |                              |                              |                  |  |
| 10                                | 1                                                                   | 1          | 3                               |                              |             |                        |                  | 7                | 1                      | 24                  |                  |                         |                       |                |                |                    |                   |                              |                              |                              |                              |                              |                              |                              |                  |  |
| 11                                | 1                                                                   | 1          | 4                               |                              |             |                        |                  | 7                | 1                      | 24                  |                  |                         |                       |                |                |                    |                   |                              |                              |                              |                              |                              |                              |                              |                  |  |
| 12                                | 1                                                                   | 1          | 5                               |                              |             |                        |                  | 7                | 1                      | 24                  |                  |                         |                       |                |                |                    |                   |                              |                              |                              |                              |                              |                              |                              |                  |  |
| 13                                | 1                                                                   | 2          | 2                               |                              |             |                        |                  | 7                | 1                      | 24                  |                  |                         |                       |                |                |                    |                   |                              |                              |                              |                              |                              |                              |                              |                  |  |
| 14                                | 1                                                                   | 2          | 3                               |                              |             |                        |                  | 7                | 1                      | 24                  |                  |                         |                       |                |                |                    |                   |                              |                              |                              |                              |                              |                              |                              |                  |  |
| 15                                | 1                                                                   | 2          | 4                               |                              |             |                        |                  | 7                | 1                      | 24                  |                  |                         |                       |                |                |                    |                   |                              |                              |                              |                              |                              |                              |                              |                  |  |
| 16                                | 1                                                                   | 2          | 5                               |                              |             |                        |                  | 7                | 1                      | 24                  |                  |                         |                       |                |                |                    |                   |                              |                              |                              |                              |                              |                              |                              |                  |  |
| 17                                | 2                                                                   | 1          | 2                               |                              |             |                        |                  | 7                | 1                      | 24                  |                  |                         |                       |                |                |                    |                   |                              |                              |                              |                              |                              |                              |                              |                  |  |
| 18                                | 2                                                                   | 1          | 3                               |                              |             |                        |                  | 7                | 1                      | 24                  |                  |                         |                       |                |                |                    |                   |                              |                              |                              |                              |                              |                              |                              |                  |  |
| 19                                | 2                                                                   | 1          | 4                               |                              |             |                        |                  | 7                | 1                      | 24                  |                  |                         |                       |                |                |                    |                   |                              |                              |                              |                              |                              |                              |                              |                  |  |
| 20                                | 2                                                                   | 1          | 5                               |                              |             |                        |                  | 7                | 1                      | 24                  |                  |                         |                       |                |                |                    |                   |                              |                              |                              |                              |                              |                              |                              |                  |  |
| 21                                | 2                                                                   | 2          | 2                               |                              |             |                        |                  | 7                | 1                      | 24                  |                  |                         |                       |                |                |                    |                   |                              |                              |                              |                              |                              |                              |                              |                  |  |
| 22                                | 2                                                                   | 2          | 3                               |                              |             |                        |                  | 7                | 1                      | 24                  |                  |                         |                       |                |                |                    |                   |                              |                              |                              |                              |                              |                              |                              |                  |  |
| 23                                | 2                                                                   | 2          | 4                               |                              |             |                        |                  | 7                | 1                      | 24                  |                  |                         |                       |                |                |                    |                   |                              |                              |                              |                              |                              |                              |                              |                  |  |
| 24                                | 2                                                                   | 2          | 5                               |                              |             |                        |                  | 7                | 1                      | 24                  |                  |                         |                       |                |                |                    |                   |                              |                              |                              |                              |                              |                              |                              |                  |  |

Sex and Abdominal Status (SAS): 1 = Total Male; 2 = Unfed; 3 = Partly Fed; 4 = Fed; 5 = Gravid/semigravid; 6 = Total Female  
 Body Part (BP): 01 = Whole Adult; 13 = Eggs; 16 = Larvae; 17 = L1; 18 = L2; 19 = L3; 20 = L4; 21 = L1&L2; 22 = L3&L4; 23 = Pupae

Labelling details: First line: FT.SEN.FR  
 Second line: SLC.BP.ST.SID

| Sample Sorting: Batch and/or Pool                                                                                                                                                                                                                                               |   |   | Project Code (PC): Avecnet WP2  |   |   | Experiment No. (EN): 1 |   |   | SERIAL NO. (SEN): 0009 |                                                                                                                                                                                                                                                                                             |   |   |   |   |      |   |   |   |   |   |   |   |   |   |   |
|---------------------------------------------------------------------------------------------------------------------------------------------------------------------------------------------------------------------------------------------------------------------------------|---|---|---------------------------------|---|---|------------------------|---|---|------------------------|---------------------------------------------------------------------------------------------------------------------------------------------------------------------------------------------------------------------------------------------------------------------------------------------|---|---|---|---|------|---|---|---|---|---|---|---|---|---|---|
| FORM TYPE (FT): SS3                                                                                                                                                                                                                                                             |   |   | ED Form Serial No. (SSEN): 1063 |   |   | ED Form Row (SFR): 5   |   |   |                        |                                                                                                                                                                                                                                                                                             |   |   |   |   |      |   |   |   |   |   |   |   |   |   |   |
| Sorting/Observation Variables                                                                                                                                                                                                                                                   |   |   |                                 |   |   |                        |   |   |                        | Sample type variables                                                                                                                                                                                                                                                                       |   |   |   |   |      |   |   |   |   |   |   |   |   |   |   |
| Dead (DD) (1 = yes, 2 = no)<br>Taxon (TX)<br>Sex and Abdominal Status (SAS)<br>Mated (MT) (1 = yes, 2 = no)<br>Choice (CH)<br>Label (LA)<br>Finish Date (FD)<br>Finish Time (FT)<br>Body Form (BF)<br>Holding period (HP)<br>Other 5 (OTH5)<br>Other 6 (OTH6)<br>Other 7 (OTH7) |   |   |                                 |   |   |                        |   |   |                        | No. of Individuals<br>Number of batches<br>Number in Batch 1 (SID = 01)<br>Number in Batch 2 (SID = 02)<br>Number in Batch 3 (SID = 03)<br>Number in Batch 4 (SID = 04)<br>Number in Batch 5 (SID = 05)<br>Number in Batch 6 (SID = 06)<br>Number in Batch 7 (SID = 07)<br>Number Discarded |   |   |   |   |      |   |   |   |   |   |   |   |   |   |   |
| MARK X FOR ALL VARIABLES WHICH MUST BE RECORDED                                                                                                                                                                                                                                 |   |   |                                 |   |   |                        |   |   |                        |                                                                                                                                                                                                                                                                                             |   |   |   |   |      |   |   |   |   |   |   |   |   |   |   |
| Define whether the attribute is categorical (CA) or continuous (CO)                                                                                                                                                                                                             |   |   |                                 |   |   |                        |   |   |                        | Sample type (ST):                                                                                                                                                                                                                                                                           |   |   |   |   |      |   |   |   |   |   |   |   |   |   |   |
| A                                                                                                                                                                                                                                                                               | B | C | D                               | E | F | G                      | H | I | J                      | K                                                                                                                                                                                                                                                                                           | L | M | N | O | P    | Q | R | S | T | U | V | W | X | Y | Z |
| 01                                                                                                                                                                                                                                                                              | 1 | 1 | 2                               |   |   |                        |   | 7 | 1                      | 0                                                                                                                                                                                                                                                                                           |   |   |   |   |      |   |   |   |   |   |   |   |   |   |   |
| 02                                                                                                                                                                                                                                                                              | 1 | 1 | 3                               |   |   |                        |   | 7 | 1                      | 0                                                                                                                                                                                                                                                                                           |   |   |   | 6 | 5016 | 1 |   |   |   |   |   |   |   |   |   |
| 03                                                                                                                                                                                                                                                                              | 1 | 1 | 4                               |   |   |                        |   | 7 | 1                      | 0                                                                                                                                                                                                                                                                                           |   |   |   |   |      |   |   |   |   |   |   |   |   |   |   |
| 04                                                                                                                                                                                                                                                                              | 1 | 1 | 5                               |   |   |                        |   | 7 | 1                      | 0                                                                                                                                                                                                                                                                                           |   |   |   |   |      |   |   |   |   |   |   |   |   |   |   |
| 05                                                                                                                                                                                                                                                                              | 1 | 2 | 2                               |   |   |                        |   | 7 | 1                      | 0                                                                                                                                                                                                                                                                                           |   |   |   |   |      |   |   |   |   |   |   |   |   |   |   |
| 06                                                                                                                                                                                                                                                                              | 1 | 2 | 3                               |   |   |                        |   | 7 | 1                      | 0                                                                                                                                                                                                                                                                                           |   |   |   |   |      |   |   |   |   |   |   |   |   |   |   |
| 07                                                                                                                                                                                                                                                                              | 1 | 2 | 4                               |   |   |                        |   | 7 | 1                      | 0                                                                                                                                                                                                                                                                                           |   |   |   |   |      |   |   |   |   |   |   |   |   |   |   |
| 08                                                                                                                                                                                                                                                                              | 1 | 2 | 5                               |   |   |                        |   | 7 | 1                      | 0                                                                                                                                                                                                                                                                                           |   |   |   |   |      |   |   |   |   |   |   |   |   |   |   |
| 09                                                                                                                                                                                                                                                                              | 1 | 1 | 2                               |   |   |                        |   | 7 | 1                      | 24                                                                                                                                                                                                                                                                                          |   |   |   |   |      |   |   |   |   |   |   |   |   |   |   |
| 10                                                                                                                                                                                                                                                                              | 1 | 1 | 3                               |   |   |                        |   | 7 | 1                      | 24                                                                                                                                                                                                                                                                                          |   |   |   |   |      |   |   |   |   |   |   |   |   |   |   |
| 11                                                                                                                                                                                                                                                                              | 1 | 1 | 4                               |   |   |                        |   | 7 | 1                      | 24                                                                                                                                                                                                                                                                                          |   |   |   |   |      |   |   |   |   |   |   |   |   |   |   |
| 12                                                                                                                                                                                                                                                                              | 1 | 1 | 5                               |   |   |                        |   | 7 | 1                      | 24                                                                                                                                                                                                                                                                                          |   |   |   |   |      |   |   |   |   |   |   |   |   |   |   |
| 13                                                                                                                                                                                                                                                                              | 1 | 2 | 2                               |   |   |                        |   | 7 | 1                      | 24                                                                                                                                                                                                                                                                                          |   |   |   |   |      |   |   |   |   |   |   |   |   |   |   |
| 14                                                                                                                                                                                                                                                                              | 1 | 2 | 3                               |   |   |                        |   | 7 | 1                      | 24                                                                                                                                                                                                                                                                                          |   |   |   |   |      |   |   |   |   |   |   |   |   |   |   |
| 15                                                                                                                                                                                                                                                                              | 1 | 2 | 4                               |   |   |                        |   | 7 | 1                      | 24                                                                                                                                                                                                                                                                                          |   |   |   |   |      |   |   |   |   |   |   |   |   |   |   |
| 16                                                                                                                                                                                                                                                                              | 1 | 2 | 5                               |   |   |                        |   | 7 | 1                      | 24                                                                                                                                                                                                                                                                                          |   |   |   |   |      |   |   |   |   |   |   |   |   |   |   |
| 17                                                                                                                                                                                                                                                                              | 2 | 1 | 2                               |   |   |                        |   | 7 | 1                      | 24                                                                                                                                                                                                                                                                                          |   |   |   | 1 |      |   |   |   |   |   |   |   |   |   |   |
| 18                                                                                                                                                                                                                                                                              | 2 | 1 | 3                               |   |   |                        |   | 7 | 1                      | 24                                                                                                                                                                                                                                                                                          |   |   |   | 1 | 5017 | 1 |   |   |   |   |   |   |   |   |   |
| 19                                                                                                                                                                                                                                                                              | 2 | 1 | 4                               |   |   |                        |   | 7 | 1                      | 24                                                                                                                                                                                                                                                                                          |   |   |   |   |      |   |   |   |   |   |   |   |   |   |   |
| 20                                                                                                                                                                                                                                                                              | 2 | 1 | 5                               |   |   |                        |   | 7 | 1                      | 24                                                                                                                                                                                                                                                                                          |   |   |   |   |      |   |   |   |   |   |   |   |   |   |   |
| 21                                                                                                                                                                                                                                                                              | 2 | 2 | 2                               |   |   |                        |   | 7 | 1                      | 24                                                                                                                                                                                                                                                                                          |   |   |   |   |      |   |   |   |   |   |   |   |   |   |   |
| 22                                                                                                                                                                                                                                                                              | 2 | 2 | 3                               |   |   |                        |   | 7 | 1                      | 24                                                                                                                                                                                                                                                                                          |   |   |   |   |      |   |   |   |   |   |   |   |   |   |   |
| 23                                                                                                                                                                                                                                                                              | 2 | 2 | 4                               |   |   |                        |   | 7 | 1                      | 24                                                                                                                                                                                                                                                                                          |   |   |   | 2 | 5018 | 1 |   |   |   |   |   |   |   |   |   |
| 24                                                                                                                                                                                                                                                                              | 2 | 2 | 5                               |   |   |                        |   | 7 | 1                      | 24                                                                                                                                                                                                                                                                                          |   |   |   |   |      |   |   |   |   |   |   |   |   |   |   |

Sex and Abdominal Status (SAS): 1 = Total Male; 2 = Unfed; 3 = Partly Fed; 4 = Fed; 5 = Gravid/semigravid; 6 = Total Female  
 Body Part (BP): 01 = Whole Adult; 13 = Eggs; 16 = Larvae; 17 = L1; 18 = L2; 19 = L3; 20 = L4; 21 = L1&L2; 22 = L3&L4; 23 = Pupae

Labelling details: First line: FT.SEN.FR  
 Second line: SLC.BP.ST.SID

|                                                                     |                                                 |            |                                 |                              |             |                        |                  |                  |                        |                     |                  |                         |                       |                |                |                    |                   |                              |                              |                              |                              |                              |                              |                              |                  |  |
|---------------------------------------------------------------------|-------------------------------------------------|------------|---------------------------------|------------------------------|-------------|------------------------|------------------|------------------|------------------------|---------------------|------------------|-------------------------|-----------------------|----------------|----------------|--------------------|-------------------|------------------------------|------------------------------|------------------------------|------------------------------|------------------------------|------------------------------|------------------------------|------------------|--|
| Sample Sorting: Batch and/or Pool                                   |                                                 |            | Project Code (PC): Avecnet WP2  |                              |             | Experiment No. (EN): 1 |                  |                  | SERIAL NO. (SEN): 0010 |                     |                  |                         |                       |                |                |                    |                   |                              |                              |                              |                              |                              |                              |                              |                  |  |
| FORM TYPE (FT): SS3                                                 |                                                 |            | ED Form Serial No. (SSEN): 1068 |                              |             | ED Form Row (SFR): 6   |                  |                  |                        |                     |                  |                         |                       |                |                |                    |                   |                              |                              |                              |                              |                              |                              |                              |                  |  |
| Form Row (FR)                                                       | Sorting/Observation Variables                   |            |                                 |                              |             |                        |                  |                  |                        |                     | No. Observed (N) | Sample Label Code (SLC) | Sample type variables |                |                |                    |                   |                              |                              |                              |                              |                              |                              |                              |                  |  |
|                                                                     | Dead (DD) (1 = yes, 2 = no)                     | Taxon (TX) | Sex and Abdominal Status (SAS)  | Mated (MT) (1 = yes, 2 = no) | Choice (CH) | Label (LA)             | Finish Date (FD) | Finish Time (FT) | Body Form (BF)         | Holding period (HP) |                  |                         | Other 5 (OTH5)        | Other 6 (OTH6) | Other 7 (OTH7) | No. of Individuals | Number of batches | Number in Batch 1 (SID = 01) | Number in Batch 2 (SID = 02) | Number in Batch 3 (SID = 03) | Number in Batch 4 (SID = 04) | Number in Batch 5 (SID = 05) | Number in Batch 6 (SID = 06) | Number in Batch 7 (SID = 07) | Number Discarded |  |
|                                                                     | MARK X FOR ALL VARIABLES WHICH MUST BE RECORDED |            |                                 |                              |             |                        |                  |                  |                        |                     |                  |                         |                       |                |                |                    |                   |                              |                              |                              |                              |                              |                              |                              |                  |  |
|                                                                     | x                                               | x          | x                               |                              |             |                        |                  |                  |                        |                     |                  |                         |                       |                |                |                    |                   |                              |                              |                              |                              |                              |                              |                              |                  |  |
| Define whether the attribute is categorical (CA) or continuous (CO) |                                                 |            |                                 |                              |             |                        |                  |                  |                        |                     |                  |                         | Sample type (ST):     |                |                |                    |                   |                              |                              |                              |                              |                              |                              |                              |                  |  |
|                                                                     |                                                 |            |                                 |                              |             |                        |                  |                  |                        |                     |                  |                         |                       |                |                |                    |                   |                              |                              |                              |                              |                              |                              |                              |                  |  |
| A                                                                   | B                                               | C          | D                               | E                            | F           | G                      | H                | I                | J                      | K                   | L                | M                       | N                     | O              | P              | Q                  | R                 | S                            | T                            | U                            | V                            | W                            | X                            | Y                            | Z                |  |
|                                                                     |                                                 |            |                                 |                              |             |                        |                  |                  |                        |                     |                  |                         |                       |                |                | 1                  |                   | 2                            | 2                            | 2                            | 2                            | 2                            | 2                            | 2                            |                  |  |
| 01                                                                  | 1                                               | 1          | 2                               |                              |             |                        |                  | 7                | 1                      | 0                   |                  |                         |                       |                |                |                    |                   |                              |                              |                              |                              |                              |                              |                              |                  |  |
| 02                                                                  | 1                                               | 1          | 3                               |                              |             |                        |                  | 7                | 1                      | 0                   |                  |                         |                       | 4              | 5019           | 1                  |                   |                              |                              |                              |                              |                              |                              |                              |                  |  |
| 03                                                                  | 1                                               | 1          | 4                               |                              |             |                        |                  | 7                | 1                      | 0                   |                  |                         |                       |                |                |                    |                   |                              |                              |                              |                              |                              |                              |                              |                  |  |
| 04                                                                  | 1                                               | 1          | 5                               |                              |             |                        |                  | 7                | 1                      | 0                   |                  |                         |                       |                |                |                    |                   |                              |                              |                              |                              |                              |                              |                              |                  |  |
| 05                                                                  | 1                                               | 2          | 2                               |                              |             |                        |                  | 7                | 1                      | 0                   |                  |                         |                       |                |                |                    |                   |                              |                              |                              |                              |                              |                              |                              |                  |  |
| 06                                                                  | 1                                               | 2          | 3                               |                              |             |                        |                  | 7                | 1                      | 0                   |                  |                         |                       |                |                |                    |                   |                              |                              |                              |                              |                              |                              |                              |                  |  |
| 07                                                                  | 1                                               | 2          | 4                               |                              |             |                        |                  | 7                | 1                      | 0                   |                  |                         |                       |                |                |                    |                   |                              |                              |                              |                              |                              |                              |                              |                  |  |
| 08                                                                  | 1                                               | 2          | 5                               |                              |             |                        |                  | 7                | 1                      | 0                   |                  |                         |                       |                |                |                    |                   |                              |                              |                              |                              |                              |                              |                              |                  |  |
| 09                                                                  | 1                                               | 1          | 2                               |                              |             |                        |                  | 7                | 1                      | 24                  |                  |                         |                       |                |                |                    |                   |                              |                              |                              |                              |                              |                              |                              |                  |  |
| 10                                                                  | 1                                               | 1          | 3                               |                              |             |                        |                  | 7                | 1                      | 24                  |                  |                         |                       |                |                |                    |                   |                              |                              |                              |                              |                              |                              |                              |                  |  |
| 11                                                                  | 1                                               | 1          | 4                               |                              |             |                        |                  | 7                | 1                      | 24                  |                  |                         |                       |                |                |                    |                   |                              |                              |                              |                              |                              |                              |                              |                  |  |
| 12                                                                  | 1                                               | 1          | 5                               |                              |             |                        |                  | 7                | 1                      | 24                  |                  |                         |                       |                |                |                    |                   |                              |                              |                              |                              |                              |                              |                              |                  |  |
| 13                                                                  | 1                                               | 2          | 2                               |                              |             |                        |                  | 7                | 1                      | 24                  |                  |                         |                       |                |                |                    |                   |                              |                              |                              |                              |                              |                              |                              |                  |  |
| 14                                                                  | 1                                               | 2          | 3                               |                              |             |                        |                  | 7                | 1                      | 24                  |                  |                         |                       |                |                |                    |                   |                              |                              |                              |                              |                              |                              |                              |                  |  |
| 15                                                                  | 1                                               | 2          | 4                               |                              |             |                        |                  | 7                | 1                      | 24                  |                  |                         |                       |                |                |                    |                   |                              |                              |                              |                              |                              |                              |                              |                  |  |
| 16                                                                  | 1                                               | 2          | 5                               |                              |             |                        |                  | 7                | 1                      | 24                  |                  |                         |                       |                |                |                    |                   |                              |                              |                              |                              |                              |                              |                              |                  |  |
| 17                                                                  | 2                                               | 1          | 2                               |                              |             |                        |                  | 7                | 1                      | 24                  |                  |                         |                       |                |                |                    |                   |                              |                              |                              |                              |                              |                              |                              |                  |  |
| 18                                                                  | 2                                               | 1          | 3                               |                              |             |                        |                  | 7                | 1                      | 24                  |                  |                         |                       |                |                |                    |                   |                              |                              |                              |                              |                              |                              |                              |                  |  |
| 19                                                                  | 2                                               | 1          | 4                               |                              |             |                        |                  | 7                | 1                      | 24                  |                  |                         |                       |                |                |                    |                   |                              |                              |                              |                              |                              |                              |                              |                  |  |
| 20                                                                  | 2                                               | 1          | 5                               |                              |             |                        |                  | 7                | 1                      | 24                  |                  |                         |                       |                |                |                    |                   |                              |                              |                              |                              |                              |                              |                              |                  |  |
| 21                                                                  | 2                                               | 2          | 2                               |                              |             |                        |                  | 7                | 1                      | 24                  |                  |                         |                       |                |                |                    |                   |                              |                              |                              |                              |                              |                              |                              |                  |  |
| 22                                                                  | 2                                               | 2          | 3                               |                              |             |                        |                  | 7                | 1                      | 24                  |                  |                         |                       |                |                |                    |                   |                              |                              |                              |                              |                              |                              |                              |                  |  |
| 23                                                                  | 2                                               | 2          | 4                               |                              |             |                        |                  | 7                | 1                      | 24                  |                  |                         |                       |                |                |                    |                   |                              |                              |                              |                              |                              |                              |                              |                  |  |
| 24                                                                  | 2                                               | 2          | 5                               |                              |             |                        |                  | 7                | 1                      | 24                  |                  |                         |                       |                |                |                    |                   |                              |                              |                              |                              |                              |                              |                              |                  |  |

Sex and Abdominal Status (SAS): 1 = Total Male; 2 = Unfed; 3 = Partly Fed; 4 = Fed; 5 = Gravid/semigravid; 6 = Total Female  
 Body Part (BP): 01 = Whole Adult; 13 = Eggs; 16 = Larvae; 17 = L1; 18 = L2; 19 = L3; 20 = L4; 21 = L1&L2; 22 = L3&L4; 23 = Pupae

Labelling details: First line: FT.SEN.FR  
 Second line: SLC.BP.ST.SID

|                                                                     |                                                 |            |                                 |                              |             |                        |                  |                  |                        |                     |                |                |                |                    |                  |                         |                       |                              |                              |                              |                              |                              |                              |                              |                  |  |
|---------------------------------------------------------------------|-------------------------------------------------|------------|---------------------------------|------------------------------|-------------|------------------------|------------------|------------------|------------------------|---------------------|----------------|----------------|----------------|--------------------|------------------|-------------------------|-----------------------|------------------------------|------------------------------|------------------------------|------------------------------|------------------------------|------------------------------|------------------------------|------------------|--|
| Sample Sorting: Batch and/or Pool                                   |                                                 |            | Project Code (PC): Avecnet WP2  |                              |             | Experiment No. (EN): 1 |                  |                  | SERIAL NO. (SEN): 0012 |                     |                |                |                |                    |                  |                         |                       |                              |                              |                              |                              |                              |                              |                              |                  |  |
| FORM TYPE (FT): SS3                                                 |                                                 |            | ED Form Serial No. (SSEN): 1068 |                              |             | ED Form Row (SFR): 7   |                  |                  |                        |                     |                |                |                |                    |                  |                         |                       |                              |                              |                              |                              |                              |                              |                              |                  |  |
| Form Row (FR)                                                       | Sorting/Observation Variables                   |            |                                 |                              |             |                        |                  |                  |                        |                     |                |                |                |                    | No. Observed (N) | Sample Label Code (SLC) | Sample type variables |                              |                              |                              |                              |                              |                              |                              |                  |  |
|                                                                     | Dead (DD) (1 = yes, 2 = no)                     | Taxon (TX) | Sex and Abdominal Status (SAS)  | Mated (MT) (1 = yes, 2 = no) | Choice (CH) | Label (LA)             | Finish Date (FD) | Finish Time (FT) | Body Form (BF)         | Holding period (HP) | Other 5 (OTH5) | Other 6 (OTH6) | Other 7 (OTH7) | No. of Individuals |                  |                         | Number of batches     | Number in Batch 1 (SID = 01) | Number in Batch 2 (SID = 02) | Number in Batch 3 (SID = 03) | Number in Batch 4 (SID = 04) | Number in Batch 5 (SID = 05) | Number in Batch 6 (SID = 06) | Number in Batch 7 (SID = 07) | Number Discarded |  |
|                                                                     | MARK X FOR ALL VARIABLES WHICH MUST BE RECORDED |            |                                 |                              |             |                        |                  |                  |                        |                     |                |                |                |                    |                  |                         |                       |                              |                              |                              |                              |                              |                              |                              |                  |  |
|                                                                     | x                                               | x          | x                               |                              |             |                        |                  |                  |                        |                     |                |                |                |                    |                  |                         |                       |                              |                              |                              |                              |                              |                              |                              |                  |  |
| Define whether the attribute is categorical (CA) or continuous (CO) |                                                 |            |                                 |                              |             |                        |                  |                  |                        |                     |                |                |                |                    |                  |                         |                       |                              |                              |                              |                              |                              |                              |                              |                  |  |
|                                                                     |                                                 |            |                                 |                              |             |                        |                  |                  |                        |                     |                |                |                | Sample type (ST):  |                  |                         |                       |                              |                              |                              |                              |                              |                              |                              |                  |  |
| A                                                                   | B                                               | C          | D                               | E                            | F           | G                      | H                | I                | J                      | K                   | L              | M              | N              | O                  | P                | Q                       | R                     | S                            | T                            | U                            | V                            | W                            | X                            | Y                            | Z                |  |
|                                                                     |                                                 |            |                                 |                              |             |                        |                  |                  |                        |                     |                |                |                |                    |                  | 1                       |                       | 2                            | 2                            | 2                            | 2                            | 2                            | 2                            | 2                            | 2                |  |
| 01                                                                  | 1                                               | 1          | 2                               |                              |             |                        |                  | 7                | 1                      | 0                   |                |                |                |                    |                  |                         |                       |                              |                              |                              |                              |                              |                              |                              |                  |  |
| 02                                                                  | 1                                               | 1          | 3                               |                              |             |                        |                  | 7                | 1                      | 0                   |                |                |                | 4                  | 5020             | 1                       |                       |                              |                              |                              |                              |                              |                              |                              |                  |  |
| 03                                                                  | 1                                               | 1          | 4                               |                              |             |                        |                  | 7                | 1                      | 0                   |                |                |                |                    |                  |                         |                       |                              |                              |                              |                              |                              |                              |                              |                  |  |
| 04                                                                  | 1                                               | 1          | 5                               |                              |             |                        |                  | 7                | 1                      | 0                   |                |                |                |                    |                  |                         |                       |                              |                              |                              |                              |                              |                              |                              |                  |  |
| 05                                                                  | 1                                               | 2          | 2                               |                              |             |                        |                  | 7                | 1                      | 0                   |                |                |                |                    |                  |                         |                       |                              |                              |                              |                              |                              |                              |                              |                  |  |
| 06                                                                  | 1                                               | 2          | 3                               |                              |             |                        |                  | 7                | 1                      | 0                   |                |                |                |                    |                  |                         |                       |                              |                              |                              |                              |                              |                              |                              |                  |  |
| 07                                                                  | 1                                               | 2          | 4                               |                              |             |                        |                  | 7                | 1                      | 0                   |                |                |                |                    |                  |                         |                       |                              |                              |                              |                              |                              |                              |                              |                  |  |
| 08                                                                  | 1                                               | 2          | 5                               |                              |             |                        |                  | 7                | 1                      | 0                   |                |                |                |                    |                  |                         |                       |                              |                              |                              |                              |                              |                              |                              |                  |  |
| 09                                                                  | 1                                               | 1          | 2                               |                              |             |                        |                  | 7                | 1                      | 24                  |                |                |                |                    |                  |                         |                       |                              |                              |                              |                              |                              |                              |                              |                  |  |
| 10                                                                  | 1                                               | 1          | 3                               |                              |             |                        |                  | 7                | 1                      | 24                  |                |                |                |                    |                  |                         |                       |                              |                              |                              |                              |                              |                              |                              |                  |  |
| 11                                                                  | 1                                               | 1          | 4                               |                              |             |                        |                  | 7                | 1                      | 24                  |                |                |                |                    |                  |                         |                       |                              |                              |                              |                              |                              |                              |                              |                  |  |
| 12                                                                  | 1                                               | 1          | 5                               |                              |             |                        |                  | 7                | 1                      | 24                  |                |                |                |                    |                  |                         |                       |                              |                              |                              |                              |                              |                              |                              |                  |  |
| 13                                                                  | 1                                               | 2          | 2                               |                              |             |                        |                  | 7                | 1                      | 24                  |                |                |                |                    |                  |                         |                       |                              |                              |                              |                              |                              |                              |                              |                  |  |
| 14                                                                  | 1                                               | 2          | 3                               |                              |             |                        |                  | 7                | 1                      | 24                  |                |                |                |                    |                  |                         |                       |                              |                              |                              |                              |                              |                              |                              |                  |  |
| 15                                                                  | 1                                               | 2          | 4                               |                              |             |                        |                  | 7                | 1                      | 24                  |                |                |                |                    |                  |                         |                       |                              |                              |                              |                              |                              |                              |                              |                  |  |
| 16                                                                  | 1                                               | 2          | 5                               |                              |             |                        |                  | 7                | 1                      | 24                  |                |                |                |                    |                  |                         |                       |                              |                              |                              |                              |                              |                              |                              |                  |  |
| 17                                                                  | 2                                               | 1          | 2                               |                              |             |                        |                  | 7                | 1                      | 24                  |                |                |                |                    |                  |                         |                       |                              |                              |                              |                              |                              |                              |                              |                  |  |
| 18                                                                  | 2                                               | 1          | 3                               |                              |             |                        |                  | 7                | 1                      | 24                  |                |                |                | 3                  | 5021             | 1                       |                       |                              |                              |                              |                              |                              |                              |                              |                  |  |
| 19                                                                  | 2                                               | 1          | 4                               |                              |             |                        |                  | 7                | 1                      | 24                  |                |                |                |                    |                  |                         |                       |                              |                              |                              |                              |                              |                              |                              |                  |  |
| 20                                                                  | 2                                               | 1          | 5                               |                              |             |                        |                  | 7                | 1                      | 24                  |                |                |                |                    |                  |                         |                       |                              |                              |                              |                              |                              |                              |                              |                  |  |
| 21                                                                  | 2                                               | 2          | 2                               |                              |             |                        |                  | 7                | 1                      | 24                  |                |                |                |                    |                  |                         |                       |                              |                              |                              |                              |                              |                              |                              |                  |  |
| 22                                                                  | 2                                               | 2          | 3                               |                              |             |                        |                  | 7                | 1                      | 24                  |                |                |                |                    |                  |                         |                       |                              |                              |                              |                              |                              |                              |                              |                  |  |
| 23                                                                  | 2                                               | 2          | 4                               |                              |             |                        |                  | 7                | 1                      | 24                  |                |                |                |                    |                  |                         |                       |                              |                              |                              |                              |                              |                              |                              |                  |  |
| 24                                                                  | 2                                               | 2          | 5                               |                              |             |                        |                  | 7                | 1                      | 24                  |                |                |                |                    |                  |                         |                       |                              |                              |                              |                              |                              |                              |                              |                  |  |

Sex and Abdominal Status (SAS): 1 = Total Male; 2 = Unfed; 3 = Partly Fed; 4 = Fed; 5 = Gravid/semigravid; 6 = Total Female  
 Body Part (BP): 01 = Whole Adult; 13 = Eggs; 16 = Larvae; 17 = L1; 18 = L2; 19 = L3; 20 = L4; 21 = L1&L2; 22 = L3&L4; 23 = Pupae

Labelling details: First line: FT.SEN.FR  
 Second line: SLC.BP.ST.SID



|                                   |                                                                     |            |                                 |                              |             |                        |                  |                  |                |                     |                |                |                |                    |                  |                         |                       |                              |                              |                              |                              |                              |                              |                              |                  |  |
|-----------------------------------|---------------------------------------------------------------------|------------|---------------------------------|------------------------------|-------------|------------------------|------------------|------------------|----------------|---------------------|----------------|----------------|----------------|--------------------|------------------|-------------------------|-----------------------|------------------------------|------------------------------|------------------------------|------------------------------|------------------------------|------------------------------|------------------------------|------------------|--|
| Sample Sorting: Batch and/or Pool |                                                                     |            | Project Code (PC): Avecnet WP2  |                              |             | Experiment No. (EN): 1 |                  |                  |                |                     |                |                |                |                    |                  |                         |                       |                              |                              |                              |                              |                              |                              |                              |                  |  |
| FORM TYPE (FT): SS3               |                                                                     |            | ED Form Serial No. (SSEN): 1068 |                              |             | ED Form Row (SFR): 8   |                  |                  |                |                     |                |                |                |                    |                  |                         |                       |                              |                              |                              |                              |                              |                              |                              |                  |  |
| SERIAL NO. (SEN): 0013            |                                                                     |            |                                 |                              |             |                        |                  |                  |                |                     |                |                |                |                    |                  |                         |                       |                              |                              |                              |                              |                              |                              |                              |                  |  |
| Form Row (FR)                     | Sorting/Observation Variables                                       |            |                                 |                              |             |                        |                  |                  |                |                     |                |                |                |                    | No. Observed (N) | Sample Label Code (SLC) | Sample type variables |                              |                              |                              |                              |                              |                              |                              |                  |  |
|                                   | Dead (DD) (1 = yes, 2 = no)                                         | Taxon (TX) | Sex and Abdominal Status (SAS)  | Mated (MT) (1 = yes, 2 = no) | Choice (CH) | Label (LA)             | Finish Date (FD) | Finish Time (FT) | Body Form (BF) | Holding period (HP) | Other 5 (OTH5) | Other 6 (OTH6) | Other 7 (OTH7) | No. of Individuals |                  |                         | Number of batches     | Number in Batch 1 (SID = 01) | Number in Batch 2 (SID = 02) | Number in Batch 3 (SID = 03) | Number in Batch 4 (SID = 04) | Number in Batch 5 (SID = 05) | Number in Batch 6 (SID = 06) | Number in Batch 7 (SID = 07) | Number Discarded |  |
|                                   | MARK X FOR ALL VARIABLES WHICH MUST BE RECORDED                     |            |                                 |                              |             |                        |                  |                  |                |                     |                |                |                |                    |                  |                         |                       |                              |                              |                              |                              |                              |                              |                              |                  |  |
|                                   | x                                                                   | x          | x                               |                              |             |                        |                  |                  |                |                     |                |                |                |                    |                  |                         |                       |                              |                              |                              |                              |                              |                              |                              |                  |  |
|                                   | Define whether the attribute is categorical (CA) or continuous (CO) |            |                                 |                              |             |                        |                  |                  |                |                     |                |                |                |                    |                  |                         |                       |                              |                              |                              |                              |                              |                              |                              |                  |  |
| A                                 | B                                                                   | C          | D                               | E                            | F           | G                      | H                | I                | J              | K                   | L              | M              | N              | O                  | P                | Q                       | R                     | S                            | T                            | U                            | V                            | W                            | X                            | Y                            | Z                |  |
|                                   |                                                                     |            |                                 |                              |             |                        |                  |                  |                |                     |                |                |                |                    |                  | 1                       |                       | 2                            | 2                            | 2                            | 2                            | 2                            | 2                            | 2                            |                  |  |
| 01                                | 1                                                                   | 1          | 2                               |                              |             |                        |                  | 7                | 1              | 0                   |                |                |                |                    |                  |                         |                       |                              |                              |                              |                              |                              |                              |                              |                  |  |
| 02                                | 1                                                                   | 1          | 3                               |                              |             |                        |                  | 7                | 1              | 0                   |                |                |                | 1                  | 5022             | 1                       |                       |                              |                              |                              |                              |                              |                              |                              |                  |  |
| 03                                | 1                                                                   | 1          | 4                               |                              |             |                        |                  | 7                | 1              | 0                   |                |                |                |                    |                  |                         |                       |                              |                              |                              |                              |                              |                              |                              |                  |  |
| 04                                | 1                                                                   | 1          | 5                               |                              |             |                        |                  | 7                | 1              | 0                   |                |                |                |                    |                  |                         |                       |                              |                              |                              |                              |                              |                              |                              |                  |  |
| 05                                | 1                                                                   | 2          | 2                               |                              |             |                        |                  | 7                | 1              | 0                   |                |                |                |                    |                  |                         |                       |                              |                              |                              |                              |                              |                              |                              |                  |  |
| 06                                | 1                                                                   | 2          | 3                               |                              |             |                        |                  | 7                | 1              | 0                   |                |                |                |                    |                  |                         |                       |                              |                              |                              |                              |                              |                              |                              |                  |  |
| 07                                | 1                                                                   | 2          | 4                               |                              |             |                        |                  | 7                | 1              | 0                   |                |                |                |                    |                  |                         |                       |                              |                              |                              |                              |                              |                              |                              |                  |  |
| 08                                | 1                                                                   | 2          | 5                               |                              |             |                        |                  | 7                | 1              | 0                   |                |                |                |                    |                  |                         |                       |                              |                              |                              |                              |                              |                              |                              |                  |  |
| 09                                | 1                                                                   | 1          | 2                               |                              |             |                        |                  | 7                | 1              | 24                  |                |                |                |                    |                  |                         |                       |                              |                              |                              |                              |                              |                              |                              |                  |  |
| 10                                | 1                                                                   | 1          | 3                               |                              |             |                        |                  | 7                | 1              | 24                  |                |                |                |                    |                  |                         |                       |                              |                              |                              |                              |                              |                              |                              |                  |  |
| 11                                | 1                                                                   | 1          | 4                               |                              |             |                        |                  | 7                | 1              | 24                  |                |                |                |                    |                  |                         |                       |                              |                              |                              |                              |                              |                              |                              |                  |  |
| 12                                | 1                                                                   | 1          | 5                               |                              |             |                        |                  | 7                | 1              | 24                  |                |                |                |                    |                  |                         |                       |                              |                              |                              |                              |                              |                              |                              |                  |  |
| 13                                | 1                                                                   | 2          | 2                               |                              |             |                        |                  | 7                | 1              | 24                  |                |                |                |                    |                  |                         |                       |                              |                              |                              |                              |                              |                              |                              |                  |  |
| 14                                | 1                                                                   | 2          | 3                               |                              |             |                        |                  | 7                | 1              | 24                  |                |                |                |                    |                  |                         |                       |                              |                              |                              |                              |                              |                              |                              |                  |  |
| 15                                | 1                                                                   | 2          | 4                               |                              |             |                        |                  | 7                | 1              | 24                  |                |                |                |                    |                  |                         |                       |                              |                              |                              |                              |                              |                              |                              |                  |  |
| 16                                | 1                                                                   | 2          | 5                               |                              |             |                        |                  | 7                | 1              | 24                  |                |                |                |                    |                  |                         |                       |                              |                              |                              |                              |                              |                              |                              |                  |  |
| 17                                | 2                                                                   | 1          | 2                               |                              |             |                        |                  | 7                | 1              | 24                  |                |                |                |                    |                  |                         |                       |                              |                              |                              |                              |                              |                              |                              |                  |  |
| 18                                | 2                                                                   | 1          | 3                               |                              |             |                        |                  | 7                | 1              | 24                  |                |                |                |                    |                  |                         |                       |                              |                              |                              |                              |                              |                              |                              |                  |  |
| 19                                | 2                                                                   | 1          | 4                               |                              |             |                        |                  | 7                | 1              | 24                  |                |                |                |                    |                  |                         |                       |                              |                              |                              |                              |                              |                              |                              |                  |  |
| 20                                | 2                                                                   | 1          | 5                               |                              |             |                        |                  | 7                | 1              | 24                  |                |                |                |                    |                  |                         |                       |                              |                              |                              |                              |                              |                              |                              |                  |  |
| 21                                | 2                                                                   | 2          | 2                               |                              |             |                        |                  | 7                | 1              | 24                  |                |                |                |                    |                  |                         |                       |                              |                              |                              |                              |                              |                              |                              |                  |  |
| 22                                | 2                                                                   | 2          | 3                               |                              |             |                        |                  | 7                | 1              | 24                  |                |                |                |                    |                  |                         |                       |                              |                              |                              |                              |                              |                              |                              |                  |  |
| 23                                | 2                                                                   | 2          | 4                               |                              |             |                        |                  | 7                | 1              | 24                  |                |                |                |                    |                  |                         |                       |                              |                              |                              |                              |                              |                              |                              |                  |  |
| 24                                | 2                                                                   | 2          | 5                               |                              |             |                        |                  | 7                | 1              | 24                  |                |                |                |                    |                  |                         |                       |                              |                              |                              |                              |                              |                              |                              |                  |  |

Sex and Abdominal Status (SAS): 1 = Total Male; 2 = Unfed; 3 = Partly Fed; 4 = Fed; 5 = Gravid/semigravid; 6 = Total Female  
 Body Part (BP): 01 = Whole Adult; 13 = Eggs; 16 = Larvae; 17 = L1; 18 = L2; 19 = L3; 20 = L4; 21 = L1&L2; 22 = L3&L4; 23 = Pupae

Labelling details: First line: FT,SEN,FR  
 Second line: SLC,BP,ST,SID

|                                   |                                                                     |            |                                 |                              |             |                        |                  |                  |                        |                     |                |                |                |                    |                  |                         |                       |                              |                              |                              |                              |                              |                              |                              |                  |  |
|-----------------------------------|---------------------------------------------------------------------|------------|---------------------------------|------------------------------|-------------|------------------------|------------------|------------------|------------------------|---------------------|----------------|----------------|----------------|--------------------|------------------|-------------------------|-----------------------|------------------------------|------------------------------|------------------------------|------------------------------|------------------------------|------------------------------|------------------------------|------------------|--|
| Sample Sorting: Batch and/or Pool |                                                                     |            | Project Code (PC): AVECNET WP2  |                              |             | Experiment No. (EN): 1 |                  |                  | SERIAL NO. (SEN): 0014 |                     |                |                |                |                    |                  |                         |                       |                              |                              |                              |                              |                              |                              |                              |                  |  |
| FORM TYPE (FT): SS3               |                                                                     |            | ED Form Serial No. (SSEN): 1063 |                              |             | ED Form Row (SFR): 9   |                  |                  |                        |                     |                |                |                |                    |                  |                         |                       |                              |                              |                              |                              |                              |                              |                              |                  |  |
| Form Row (FR)                     | Sorting/Observation Variables                                       |            |                                 |                              |             |                        |                  |                  |                        |                     |                |                |                |                    | No. Observed (N) | Sample Label Code (SLC) | Sample type variables |                              |                              |                              |                              |                              |                              |                              |                  |  |
|                                   | Dead (DD) (1 = yes, 2 = no)                                         | Taxon (TX) | Sex and Abdominal Status (SAS)  | Mated (MT) (1 = yes, 2 = no) | Choice (CH) | Label (LA)             | Finish Date (FD) | Finish Time (FT) | Body Form (BF)         | Holding period (HP) | Other 5 (OTH5) | Other 6 (OTH6) | Other 7 (OTH7) | No. of Individuals |                  |                         | Number of batches     | Number in Batch 1 (SID = 01) | Number in Batch 2 (SID = 02) | Number in Batch 3 (SID = 03) | Number in Batch 4 (SID = 04) | Number in Batch 5 (SID = 05) | Number in Batch 6 (SID = 06) | Number in Batch 7 (SID = 07) | Number Discarded |  |
|                                   | MARK X FOR ALL VARIABLES WHICH MUST BE RECORDED                     |            |                                 |                              |             |                        |                  |                  |                        |                     |                |                |                |                    |                  |                         |                       |                              |                              |                              |                              |                              |                              |                              |                  |  |
|                                   | x                                                                   | x          | x                               |                              |             |                        |                  |                  |                        |                     |                |                |                |                    |                  |                         |                       |                              |                              |                              |                              |                              |                              |                              |                  |  |
|                                   | Define whether the attribute is categorical (CA) or continuous (CO) |            |                                 |                              |             |                        |                  |                  |                        |                     |                |                |                |                    |                  |                         |                       |                              |                              |                              |                              |                              |                              |                              |                  |  |
| Sample type (ST):                 |                                                                     |            |                                 |                              |             |                        |                  |                  |                        |                     |                |                |                |                    |                  |                         |                       |                              |                              |                              |                              |                              |                              |                              |                  |  |
| A                                 | B                                                                   | C          | D                               | E                            | F           | G                      | H                | I                | J                      | K                   | L              | M              | N              | O                  | P                | Q                       | R                     | S                            | T                            | U                            | V                            | W                            | X                            | Y                            | Z                |  |
|                                   |                                                                     |            |                                 |                              |             |                        |                  |                  |                        |                     |                |                |                |                    |                  | 1                       |                       | 2                            | 2                            | 2                            | 2                            | 2                            | 2                            | 2                            | 2                |  |
| 01                                | 1                                                                   | 1          | 2                               |                              |             |                        |                  | 7                | 1                      | 0                   |                |                |                |                    |                  |                         |                       |                              |                              |                              |                              |                              |                              |                              |                  |  |
| 02                                | 1                                                                   | 1          | 3                               |                              |             |                        |                  | 7                | 1                      | 0                   |                |                |                | 2                  | 5023             | 1                       |                       |                              |                              |                              |                              |                              |                              |                              |                  |  |
| 03                                | 1                                                                   | 1          | 4                               |                              |             |                        |                  | 7                | 1                      | 0                   |                |                |                |                    |                  |                         |                       |                              |                              |                              |                              |                              |                              |                              |                  |  |
| 04                                | 1                                                                   | 1          | 5                               |                              |             |                        |                  | 7                | 1                      | 0                   |                |                |                |                    |                  |                         |                       |                              |                              |                              |                              |                              |                              |                              |                  |  |
| 05                                | 1                                                                   | 2          | 2                               |                              |             |                        |                  | 7                | 1                      | 0                   |                |                |                |                    |                  |                         |                       |                              |                              |                              |                              |                              |                              |                              |                  |  |
| 06                                | 1                                                                   | 2          | 3                               |                              |             |                        |                  | 7                | 1                      | 0                   |                |                |                | 1                  | 5024             | 1                       |                       |                              |                              |                              |                              |                              |                              |                              |                  |  |
| 07                                | 1                                                                   | 2          | 4                               |                              |             |                        |                  | 7                | 1                      | 0                   |                |                |                |                    |                  |                         |                       |                              |                              |                              |                              |                              |                              |                              |                  |  |
| 08                                | 1                                                                   | 2          | 5                               |                              |             |                        |                  | 7                | 1                      | 0                   |                |                |                |                    |                  |                         |                       |                              |                              |                              |                              |                              |                              |                              |                  |  |
| 09                                | 1                                                                   | 1          | 2                               |                              |             |                        |                  | 7                | 1                      | 24                  |                |                |                |                    |                  |                         |                       |                              |                              |                              |                              |                              |                              |                              |                  |  |
| 10                                | 1                                                                   | 1          | 3                               |                              |             |                        |                  | 7                | 1                      | 24                  |                |                |                |                    |                  |                         |                       |                              |                              |                              |                              |                              |                              |                              |                  |  |
| 11                                | 1                                                                   | 1          | 4                               |                              |             |                        |                  | 7                | 1                      | 24                  |                |                |                |                    |                  |                         |                       |                              |                              |                              |                              |                              |                              |                              |                  |  |
| 12                                | 1                                                                   | 1          | 5                               |                              |             |                        |                  | 7                | 1                      | 24                  |                |                |                |                    |                  |                         |                       |                              |                              |                              |                              |                              |                              |                              |                  |  |
| 13                                | 1                                                                   | 2          | 2                               |                              |             |                        |                  | 7                | 1                      | 24                  |                |                |                |                    |                  |                         |                       |                              |                              |                              |                              |                              |                              |                              |                  |  |
| 14                                | 1                                                                   | 2          | 3                               |                              |             |                        |                  | 7                | 1                      | 24                  |                |                |                |                    |                  |                         |                       |                              |                              |                              |                              |                              |                              |                              |                  |  |
| 15                                | 1                                                                   | 2          | 4                               |                              |             |                        |                  | 7                | 1                      | 24                  |                |                |                |                    |                  |                         |                       |                              |                              |                              |                              |                              |                              |                              |                  |  |
| 16                                | 1                                                                   | 2          | 5                               |                              |             |                        |                  | 7                | 1                      | 24                  |                |                |                |                    |                  |                         |                       |                              |                              |                              |                              |                              |                              |                              |                  |  |
| 17                                | 2                                                                   | 1          | 2                               |                              |             |                        |                  | 7                | 1                      | 24                  |                |                |                |                    |                  |                         |                       |                              |                              |                              |                              |                              |                              |                              |                  |  |
| 18                                | 2                                                                   | 1          | 3                               |                              |             |                        |                  | 7                | 1                      | 24                  |                |                |                |                    |                  |                         |                       |                              |                              |                              |                              |                              |                              |                              |                  |  |
| 19                                | 2                                                                   | 1          | 4                               |                              |             |                        |                  | 7                | 1                      | 24                  |                |                |                |                    |                  |                         |                       |                              |                              |                              |                              |                              |                              |                              |                  |  |
| 20                                | 2                                                                   | 1          | 5                               |                              |             |                        |                  | 7                | 1                      | 24                  |                |                |                |                    |                  |                         |                       |                              |                              |                              |                              |                              |                              |                              |                  |  |
| 21                                | 2                                                                   | 2          | 2                               |                              |             |                        |                  | 7                | 1                      | 24                  |                |                |                |                    |                  |                         |                       |                              |                              |                              |                              |                              |                              |                              |                  |  |
| 22                                | 2                                                                   | 2          | 3                               |                              |             |                        |                  | 7                | 1                      | 24                  |                |                |                |                    |                  |                         |                       |                              |                              |                              |                              |                              |                              |                              |                  |  |
| 23                                | 2                                                                   | 2          | 4                               |                              |             |                        |                  | 7                | 1                      | 24                  |                |                |                |                    |                  |                         |                       |                              |                              |                              |                              |                              |                              |                              |                  |  |
| 24                                | 2                                                                   | 2          | 5                               |                              |             |                        |                  | 7                | 1                      | 24                  |                |                |                |                    |                  |                         |                       |                              |                              |                              |                              |                              |                              |                              |                  |  |

Sex and Abdominal Status (SAS): 1 = Total Male; 2 = Unfed; 3 = Partly Fed; 4 = Fed; 5 = Gravid/semigravid; 6 = Total Female  
 Body Part (BP): 01 = Whole Adult; 13 = Eggs; 16 = Larvae; 17 = L1; 18 = L2; 19 = L3; 20 = L4; 21 = L1&L2; 22 = L3&L4; 23 = Pupae

Labelling details: First line: FT.SEN.FR  
 Second line: SLC.BP.ST.SID

|                                                                     |                                                 |            |                                 |                              |             |            |                        |                  |                |                     |                        |                |                |                    |                  |                         |                       |                              |                              |                              |                              |                              |                              |                              |                  |
|---------------------------------------------------------------------|-------------------------------------------------|------------|---------------------------------|------------------------------|-------------|------------|------------------------|------------------|----------------|---------------------|------------------------|----------------|----------------|--------------------|------------------|-------------------------|-----------------------|------------------------------|------------------------------|------------------------------|------------------------------|------------------------------|------------------------------|------------------------------|------------------|
| Sample Sorting: Batch and/or Pool                                   |                                                 |            | Project Code (PC): AVECNET WP2  |                              |             |            | Experiment No. (EN): 1 |                  |                |                     | SERIAL NO. (SEN): 0015 |                |                |                    |                  |                         |                       |                              |                              |                              |                              |                              |                              |                              |                  |
| FORM TYPE (FT): SS3                                                 |                                                 |            | ED Form Serial No. (SSEN): 1068 |                              |             |            | ED Form Row (SFR): 10  |                  |                |                     |                        |                |                |                    |                  |                         |                       |                              |                              |                              |                              |                              |                              |                              |                  |
| Form Row (FR)                                                       | Sorting/Observation Variables                   |            |                                 |                              |             |            |                        |                  |                |                     |                        |                |                |                    | No. Observed (N) | Sample Label Code (SLC) | Sample type variables |                              |                              |                              |                              |                              |                              |                              |                  |
|                                                                     | Dead (DD) (1 = yes, 2 = no)                     | Taxon (TX) | Sex and Abdominal Status (SAS)  | Mated (MT) (1 = yes, 2 = no) | Choice (CH) | Label (LA) | Finish Date (FD)       | Finish Time (FT) | Body Form (BF) | Holding period (HP) | Other 5 (OTH5)         | Other 6 (OTH6) | Other 7 (OTH7) | No. of individuals |                  |                         | Number of batches     | Number in Batch 1 (SID = 01) | Number in Batch 2 (SID = 02) | Number in Batch 3 (SID = 03) | Number in Batch 4 (SID = 04) | Number in Batch 5 (SID = 05) | Number in Batch 6 (SID = 06) | Number in Batch 7 (SID = 07) | Number Discarded |
|                                                                     | MARK X FOR ALL VARIABLES WHICH MUST BE RECORDED |            |                                 |                              |             |            |                        |                  |                |                     |                        |                |                |                    |                  |                         |                       |                              |                              |                              |                              |                              |                              |                              |                  |
|                                                                     | x                                               | x          | x                               |                              |             |            |                        |                  |                |                     |                        |                |                |                    |                  |                         |                       |                              |                              |                              |                              |                              |                              |                              |                  |
| Define whether the attribute is categorical (CA) or continuous (CO) |                                                 |            |                                 |                              |             |            |                        |                  |                |                     |                        |                |                |                    |                  |                         |                       |                              |                              |                              |                              |                              |                              |                              |                  |
| A                                                                   | B                                               | C          | D                               | E                            | F           | G          | H                      | I                | J              | K                   | L                      | M              | N              | O                  | P                | Q                       | R                     | S                            | T                            | U                            | V                            | W                            | X                            | Y                            | Z                |
|                                                                     |                                                 |            |                                 |                              |             |            |                        |                  |                |                     |                        |                |                |                    |                  | 1                       |                       | 2                            | 2                            | 2                            | 2                            | 2                            | 2                            | 2                            | 2                |
| 01                                                                  | 1                                               | 1          | 2                               |                              |             |            |                        |                  | 7              | 1                   | 0                      |                |                |                    |                  |                         |                       |                              |                              |                              |                              |                              |                              |                              |                  |
| 02                                                                  | 1                                               | 1          | 3                               |                              |             |            |                        |                  | 7              | 1                   | 0                      |                |                |                    | 0                |                         |                       |                              |                              |                              |                              |                              |                              |                              |                  |
| 03                                                                  | 1                                               | 1          | 4                               |                              |             |            |                        |                  | 7              | 1                   | 0                      |                |                |                    |                  |                         |                       |                              |                              |                              |                              |                              |                              |                              |                  |
| 04                                                                  | 1                                               | 1          | 5                               |                              |             |            |                        |                  | 7              | 1                   | 0                      |                |                |                    |                  |                         |                       |                              |                              |                              |                              |                              |                              |                              |                  |
| 05                                                                  | 1                                               | 2          | 2                               |                              |             |            |                        |                  | 7              | 1                   | 0                      |                |                |                    |                  |                         |                       |                              |                              |                              |                              |                              |                              |                              |                  |
| 06                                                                  | 1                                               | 2          | 3                               |                              |             |            |                        |                  | 7              | 1                   | 0                      |                |                |                    | 0                |                         |                       |                              |                              |                              |                              |                              |                              |                              |                  |
| 07                                                                  | 1                                               | 2          | 4                               |                              |             |            |                        |                  | 7              | 1                   | 0                      |                |                |                    |                  |                         |                       |                              |                              |                              |                              |                              |                              |                              |                  |
| 08                                                                  | 1                                               | 2          | 5                               |                              |             |            |                        |                  | 7              | 1                   | 0                      |                |                |                    |                  |                         |                       |                              |                              |                              |                              |                              |                              |                              |                  |
| 09                                                                  | 1                                               | 1          | 2                               |                              |             |            |                        |                  | 7              | 1                   | 24                     |                |                |                    |                  |                         |                       |                              |                              |                              |                              |                              |                              |                              |                  |
| 10                                                                  | 1                                               | 1          | 3                               |                              |             |            |                        |                  | 7              | 1                   | 24                     |                |                |                    |                  |                         |                       |                              |                              |                              |                              |                              |                              |                              |                  |
| 11                                                                  | 1                                               | 1          | 4                               |                              |             |            |                        |                  | 7              | 1                   | 24                     |                |                |                    |                  |                         |                       |                              |                              |                              |                              |                              |                              |                              |                  |
| 12                                                                  | 1                                               | 1          | 5                               |                              |             |            |                        |                  | 7              | 1                   | 24                     |                |                |                    |                  |                         |                       |                              |                              |                              |                              |                              |                              |                              |                  |
| 13                                                                  | 1                                               | 2          | 2                               |                              |             |            |                        |                  | 7              | 1                   | 24                     |                |                |                    |                  |                         |                       |                              |                              |                              |                              |                              |                              |                              |                  |
| 14                                                                  | 1                                               | 2          | 3                               |                              |             |            |                        |                  | 7              | 1                   | 24                     |                |                |                    |                  |                         |                       |                              |                              |                              |                              |                              |                              |                              |                  |
| 15                                                                  | 1                                               | 2          | 4                               |                              |             |            |                        |                  | 7              | 1                   | 24                     |                |                |                    |                  |                         |                       |                              |                              |                              |                              |                              |                              |                              |                  |
| 16                                                                  | 1                                               | 2          | 5                               |                              |             |            |                        |                  | 7              | 1                   | 24                     |                |                |                    |                  |                         |                       |                              |                              |                              |                              |                              |                              |                              |                  |
| 17                                                                  | 2                                               | 1          | 2                               |                              |             |            |                        |                  | 7              | 1                   | 24                     |                |                |                    | 0                |                         |                       |                              |                              |                              |                              |                              |                              |                              |                  |
| 18                                                                  | 2                                               | 1          | 3                               |                              |             |            |                        |                  | 7              | 1                   | 24                     |                |                |                    |                  |                         |                       |                              |                              |                              |                              |                              |                              |                              |                  |
| 19                                                                  | 2                                               | 1          | 4                               |                              |             |            |                        |                  | 7              | 1                   | 24                     |                |                |                    |                  |                         |                       |                              |                              |                              |                              |                              |                              |                              |                  |
| 20                                                                  | 2                                               | 1          | 5                               |                              |             |            |                        |                  | 7              | 1                   | 24                     |                |                |                    |                  |                         |                       |                              |                              |                              |                              |                              |                              |                              |                  |
| 21                                                                  | 2                                               | 2          | 2                               |                              |             |            |                        |                  | 7              | 1                   | 24                     |                |                |                    |                  |                         |                       |                              |                              |                              |                              |                              |                              |                              |                  |
| 22                                                                  | 2                                               | 2          | 3                               |                              |             |            |                        |                  | 7              | 1                   | 24                     |                |                |                    |                  |                         |                       |                              |                              |                              |                              |                              |                              |                              |                  |
| 23                                                                  | 2                                               | 2          | 4                               |                              |             |            |                        |                  | 7              | 1                   | 24                     |                |                |                    |                  |                         |                       |                              |                              |                              |                              |                              |                              |                              |                  |
| 24                                                                  | 2                                               | 2          | 5                               |                              |             |            |                        |                  | 7              | 1                   | 24                     |                |                |                    |                  |                         |                       |                              |                              |                              |                              |                              |                              |                              |                  |

Sex and Abdominal Status (SAS): 1 = Total Male; 2 = Unfed; 3 = Partly Fed; 4 = Fed; 5 = Gravid/semigravid; 6 = Total Female  
 Body Part (BP): 01 = Whole Adult; 13 = Eggs; 16 = Larvae; 17 = L1; 18 = L2; 19 = L3; 20 = L4; 21 = L1&L2; 22 = L3&L4; 23 = Pupae

Labelling details: First line: FT.SEN.FR  
 Second line: SLC.BP.ST\_SID

|                                                                     |                                                 |            |                                 |                              |             |                        |                  |                  |                        |                     |                |                  |                         |                       |                |                    |                   |                              |                              |                              |                              |                              |                              |                              |                  |  |  |
|---------------------------------------------------------------------|-------------------------------------------------|------------|---------------------------------|------------------------------|-------------|------------------------|------------------|------------------|------------------------|---------------------|----------------|------------------|-------------------------|-----------------------|----------------|--------------------|-------------------|------------------------------|------------------------------|------------------------------|------------------------------|------------------------------|------------------------------|------------------------------|------------------|--|--|
| Sample Sorting: Batch and/or Pool                                   |                                                 |            | Project Code (PC): Avecnet WP2  |                              |             | Experiment No. (EN): 1 |                  |                  | SERIAL NO. (SEN): 0016 |                     |                |                  |                         |                       |                |                    |                   |                              |                              |                              |                              |                              |                              |                              |                  |  |  |
| FORM TYPE (FT): SS3                                                 |                                                 |            | ED Form Serial No. (SSEN): 1068 |                              |             | ED Form Row (SFR): 11  |                  |                  |                        |                     |                |                  |                         |                       |                |                    |                   |                              |                              |                              |                              |                              |                              |                              |                  |  |  |
| Form Row (FR)                                                       | Sorting/Observation Variables                   |            |                                 |                              |             |                        |                  |                  |                        |                     |                | No. Observed (N) | Sample Label Code (SLC) | Sample type variables |                |                    |                   |                              |                              |                              |                              |                              |                              |                              |                  |  |  |
|                                                                     | Dead (DD) (1 = yes, 2 = no)                     | Taxon (TX) | Sex and Abdominal Status (SAS)  | Mated (MT) (1 = yes, 2 = no) | Choice (CH) | Label (LA)             | Finish Date (FD) | Finish Time (FT) | Body Form (BF)         | Holding period (HP) | Other 5 (OTH5) |                  |                         | Other 6 (OTH6)        | Other 7 (OTH7) | No. of Individuals | Number of batches | Number in Batch 1 (SID = 01) | Number in Batch 2 (SID = 02) | Number in Batch 3 (SID = 03) | Number in Batch 4 (SID = 04) | Number in Batch 5 (SID = 05) | Number in Batch 6 (SID = 06) | Number in Batch 7 (SID = 07) | Number Discarded |  |  |
|                                                                     | MARK X FOR ALL VARIABLES WHICH MUST BE RECORDED |            |                                 |                              |             |                        |                  |                  |                        |                     |                |                  |                         |                       |                |                    |                   |                              |                              |                              |                              |                              |                              |                              |                  |  |  |
|                                                                     | x                                               | x          | x                               |                              |             |                        |                  |                  |                        |                     |                |                  |                         |                       |                |                    |                   |                              |                              |                              |                              |                              |                              |                              |                  |  |  |
| Define whether the attribute is categorical (CA) or continuous (CO) |                                                 |            |                                 |                              |             |                        |                  |                  |                        |                     |                |                  | Sample type (ST):       |                       |                |                    |                   |                              |                              |                              |                              |                              |                              |                              |                  |  |  |
| A                                                                   | B                                               | C          | D                               | E                            | F           | G                      | H                | I                | J                      | K                   | L              | M                | N                       | O                     | P              | Q                  | R                 | S                            | T                            | U                            | V                            | W                            | X                            | Y                            | Z                |  |  |
|                                                                     |                                                 |            |                                 |                              |             |                        |                  |                  |                        |                     |                |                  |                         |                       |                | 1                  |                   | 2                            | 2                            | 2                            | 2                            | 2                            | 2                            | 2                            |                  |  |  |
| 01                                                                  | 1                                               | 1          | 2                               |                              |             |                        |                  |                  | 7                      | 1                   | 0              |                  |                         |                       |                |                    |                   |                              |                              |                              |                              |                              |                              |                              |                  |  |  |
| 02                                                                  | 1                                               | 1          | 3                               |                              |             |                        |                  |                  | 7                      | 1                   | 0              |                  |                         | 0                     |                |                    |                   |                              |                              |                              |                              |                              |                              |                              |                  |  |  |
| 03                                                                  | 1                                               | 1          | 4                               |                              |             |                        |                  |                  | 7                      | 1                   | 0              |                  |                         |                       |                |                    |                   |                              |                              |                              |                              |                              |                              |                              |                  |  |  |
| 04                                                                  | 1                                               | 1          | 5                               |                              |             |                        |                  |                  | 7                      | 1                   | 0              |                  |                         |                       |                |                    |                   |                              |                              |                              |                              |                              |                              |                              |                  |  |  |
| 05                                                                  | 1                                               | 2          | 2                               |                              |             |                        |                  |                  | 7                      | 1                   | 0              |                  |                         |                       |                |                    |                   |                              |                              |                              |                              |                              |                              |                              |                  |  |  |
| 06                                                                  | 1                                               | 2          | 3                               |                              |             |                        |                  |                  | 7                      | 1                   | 0              |                  |                         | 0                     |                |                    |                   |                              |                              |                              |                              |                              |                              |                              |                  |  |  |
| 07                                                                  | 1                                               | 2          | 4                               |                              |             |                        |                  |                  | 7                      | 1                   | 0              |                  |                         |                       |                |                    |                   |                              |                              |                              |                              |                              |                              |                              |                  |  |  |
| 08                                                                  | 1                                               | 2          | 5                               |                              |             |                        |                  |                  | 7                      | 1                   | 0              |                  |                         |                       |                |                    |                   |                              |                              |                              |                              |                              |                              |                              |                  |  |  |
| 09                                                                  | 1                                               | 1          | 2                               |                              |             |                        |                  |                  | 7                      | 1                   | 24             |                  |                         |                       |                |                    |                   |                              |                              |                              |                              |                              |                              |                              |                  |  |  |
| 10                                                                  | 1                                               | 1          | 3                               |                              |             |                        |                  |                  | 7                      | 1                   | 24             |                  |                         |                       |                |                    |                   |                              |                              |                              |                              |                              |                              |                              |                  |  |  |
| 11                                                                  | 1                                               | 1          | 4                               |                              |             |                        |                  |                  | 7                      | 1                   | 24             |                  |                         |                       |                |                    |                   |                              |                              |                              |                              |                              |                              |                              |                  |  |  |
| 12                                                                  | 1                                               | 1          | 5                               |                              |             |                        |                  |                  | 7                      | 1                   | 24             |                  |                         |                       |                |                    |                   |                              |                              |                              |                              |                              |                              |                              |                  |  |  |
| 13                                                                  | 1                                               | 2          | 2                               |                              |             |                        |                  |                  | 7                      | 1                   | 24             |                  |                         |                       |                |                    |                   |                              |                              |                              |                              |                              |                              |                              |                  |  |  |
| 14                                                                  | 1                                               | 2          | 3                               |                              |             |                        |                  |                  | 7                      | 1                   | 24             |                  |                         | 0                     |                |                    |                   |                              |                              |                              |                              |                              |                              |                              |                  |  |  |
| 15                                                                  | 1                                               | 2          | 4                               |                              |             |                        |                  |                  | 7                      | 1                   | 24             |                  |                         |                       |                |                    |                   |                              |                              |                              |                              |                              |                              |                              |                  |  |  |
| 16                                                                  | 1                                               | 2          | 5                               |                              |             |                        |                  |                  | 7                      | 1                   | 24             |                  |                         |                       |                |                    |                   |                              |                              |                              |                              |                              |                              |                              |                  |  |  |
| 17                                                                  | 2                                               | 1          | 2                               |                              |             |                        |                  |                  | 7                      | 1                   | 24             |                  |                         |                       |                |                    |                   |                              |                              |                              |                              |                              |                              |                              |                  |  |  |
| 18                                                                  | 2                                               | 1          | 3                               |                              |             |                        |                  |                  | 7                      | 1                   | 24             |                  |                         | 0                     |                |                    |                   |                              |                              |                              |                              |                              |                              |                              |                  |  |  |
| 19                                                                  | 2                                               | 1          | 4                               |                              |             |                        |                  |                  | 7                      | 1                   | 24             |                  |                         |                       |                |                    |                   |                              |                              |                              |                              |                              |                              |                              |                  |  |  |
| 20                                                                  | 2                                               | 1          | 5                               |                              |             |                        |                  |                  | 7                      | 1                   | 24             |                  |                         |                       |                |                    |                   |                              |                              |                              |                              |                              |                              |                              |                  |  |  |
| 21                                                                  | 2                                               | 2          | 2                               |                              |             |                        |                  |                  | 7                      | 1                   | 24             |                  |                         |                       |                |                    |                   |                              |                              |                              |                              |                              |                              |                              |                  |  |  |
| 22                                                                  | 2                                               | 2          | 3                               |                              |             |                        |                  |                  | 7                      | 1                   | 24             |                  |                         | 0                     |                |                    |                   |                              |                              |                              |                              |                              |                              |                              |                  |  |  |
| 23                                                                  | 2                                               | 2          | 4                               |                              |             |                        |                  |                  | 7                      | 1                   | 24             |                  |                         |                       |                |                    |                   |                              |                              |                              |                              |                              |                              |                              |                  |  |  |
| 24                                                                  | 2                                               | 2          | 5                               |                              |             |                        |                  |                  | 7                      | 1                   | 24             |                  |                         |                       |                |                    |                   |                              |                              |                              |                              |                              |                              |                              |                  |  |  |

Sex and Abdominal Status (SAS): 1 = Total Male; 2 = Unfed; 3 = Partly Fed; 4 = Fed; 5 = Gravid/semigravid; 6 = Total Female  
 Body Part (BP): 01 = Whole Adult; 13 = Eggs; 16 = Larvae; 17 = L1; 18 = L2; 19 = L3; 20 = L4; 21 = L1&L2; 22 = L3&L4; 23 = Pupae

Labelling details: First line: FT.SEN.FR  
 Second line: SLC.BP.ST.SID

|                                   |                                                                     |            |                                |                                 |             |            |                  |                        |                |                     |                |                        |                |                    |                  |                         |                       |                              |                              |                              |                              |                              |                              |                              |                  |  |
|-----------------------------------|---------------------------------------------------------------------|------------|--------------------------------|---------------------------------|-------------|------------|------------------|------------------------|----------------|---------------------|----------------|------------------------|----------------|--------------------|------------------|-------------------------|-----------------------|------------------------------|------------------------------|------------------------------|------------------------------|------------------------------|------------------------------|------------------------------|------------------|--|
| Sample Sorting: Batch and/or Pool |                                                                     |            |                                | Project Code (PC): Avecnet WP2  |             |            |                  | Experiment No. (EN): 1 |                |                     |                | SERIAL NO. (SEN): 0017 |                |                    |                  |                         |                       |                              |                              |                              |                              |                              |                              |                              |                  |  |
| FORM TYPE (FT): SS3               |                                                                     |            |                                | ED Form Serial No. (SSEN): 1068 |             |            |                  | ED Form Row (SFR): 12  |                |                     |                |                        |                |                    |                  |                         |                       |                              |                              |                              |                              |                              |                              |                              |                  |  |
| Form Row (FR)                     | Sorting/Observation Variables                                       |            |                                |                                 |             |            |                  |                        |                |                     |                |                        |                |                    | No. Observed (N) | Sample Label Code (SLC) | Sample type variables |                              |                              |                              |                              |                              |                              |                              |                  |  |
|                                   | Dead (DD) (1 = yes, 2 = no)                                         | Taxon (TX) | Sex and Abdominal Status (SAS) | Mated (MT) (1 = yes, 2 = no)    | Choice (CH) | Label (LA) | Finish Date (FD) | Finish Time (FT)       | Body Form (BF) | Holding period (HP) | Other 5 (OTH5) | Other 6 (OTH6)         | Other 7 (OTH7) | No. of Individuals |                  |                         | Number of batches     | Number in Batch 1 (SID = 01) | Number in Batch 2 (SID = 02) | Number in Batch 3 (SID = 03) | Number in Batch 4 (SID = 04) | Number in Batch 5 (SID = 05) | Number in Batch 6 (SID = 06) | Number in Batch 7 (SID = 07) | Number Discarded |  |
|                                   | MARK X FOR ALL VARIABLES WHICH MUST BE RECORDED                     |            |                                |                                 |             |            |                  |                        |                |                     |                |                        |                |                    |                  |                         |                       |                              |                              |                              |                              |                              |                              |                              |                  |  |
|                                   | x                                                                   | x          | x                              |                                 |             |            |                  |                        |                |                     |                |                        |                |                    |                  |                         |                       |                              |                              |                              |                              |                              |                              |                              |                  |  |
|                                   | Define whether the attribute is categorical (CA) or continuous (CO) |            |                                |                                 |             |            |                  |                        |                |                     |                |                        |                |                    |                  |                         |                       |                              |                              |                              |                              |                              |                              |                              |                  |  |
| A                                 | B                                                                   | C          | D                              | E                               | F           | G          | H                | I                      | J              | K                   | L              | M                      | N              | O                  | P                | Q                       | R                     | S                            | T                            | U                            | V                            | W                            | X                            | Y                            | Z                |  |
| 01                                | 1                                                                   | 1          | 2                              |                                 |             |            |                  | 7                      | 1              | 0                   |                |                        |                |                    |                  | 1                       |                       | 2                            | 2                            | 2                            | 2                            | 2                            | 2                            | 2                            |                  |  |
| 02                                | 1                                                                   | 1          | 3                              |                                 |             |            |                  | 7                      | 1              | 0                   |                |                        |                |                    | 0                |                         |                       |                              |                              |                              |                              |                              |                              |                              |                  |  |
| 03                                | 1                                                                   | 1          | 4                              |                                 |             |            |                  | 7                      | 1              | 0                   |                |                        |                |                    |                  |                         |                       |                              |                              |                              |                              |                              |                              |                              |                  |  |
| 04                                | 1                                                                   | 1          | 5                              |                                 |             |            |                  | 7                      | 1              | 0                   |                |                        |                |                    |                  |                         |                       |                              |                              |                              |                              |                              |                              |                              |                  |  |
| 05                                | 1                                                                   | 2          | 2                              |                                 |             |            |                  | 7                      | 1              | 0                   |                |                        |                |                    |                  |                         |                       |                              |                              |                              |                              |                              |                              |                              |                  |  |
| 06                                | 1                                                                   | 2          | 3                              |                                 |             |            |                  | 7                      | 1              | 0                   |                |                        |                |                    | 0                |                         |                       |                              |                              |                              |                              |                              |                              |                              |                  |  |
| 07                                | 1                                                                   | 2          | 4                              |                                 |             |            |                  | 7                      | 1              | 0                   |                |                        |                |                    |                  |                         |                       |                              |                              |                              |                              |                              |                              |                              |                  |  |
| 08                                | 1                                                                   | 2          | 5                              |                                 |             |            |                  | 7                      | 1              | 0                   |                |                        |                |                    |                  |                         |                       |                              |                              |                              |                              |                              |                              |                              |                  |  |
| 09                                | 1                                                                   | 1          | 2                              |                                 |             |            |                  | 7                      | 1              | 24                  |                |                        |                |                    |                  |                         |                       |                              |                              |                              |                              |                              |                              |                              |                  |  |
| 10                                | 1                                                                   | 1          | 3                              |                                 |             |            |                  | 7                      | 1              | 24                  |                |                        |                |                    |                  |                         |                       |                              |                              |                              |                              |                              |                              |                              |                  |  |
| 11                                | 1                                                                   | 1          | 4                              |                                 |             |            |                  | 7                      | 1              | 24                  |                |                        |                |                    |                  |                         |                       |                              |                              |                              |                              |                              |                              |                              |                  |  |
| 12                                | 1                                                                   | 1          | 5                              |                                 |             |            |                  | 7                      | 1              | 24                  |                |                        |                |                    |                  |                         |                       |                              |                              |                              |                              |                              |                              |                              |                  |  |
| 13                                | 1                                                                   | 2          | 2                              |                                 |             |            |                  | 7                      | 1              | 24                  |                |                        |                |                    |                  |                         |                       |                              |                              |                              |                              |                              |                              |                              |                  |  |
| 14                                | 1                                                                   | 2          | 3                              |                                 |             |            |                  | 7                      | 1              | 24                  |                |                        |                |                    | 0                |                         |                       |                              |                              |                              |                              |                              |                              |                              |                  |  |
| 15                                | 1                                                                   | 2          | 4                              |                                 |             |            |                  | 7                      | 1              | 24                  |                |                        |                |                    |                  |                         |                       |                              |                              |                              |                              |                              |                              |                              |                  |  |
| 16                                | 1                                                                   | 2          | 5                              |                                 |             |            |                  | 7                      | 1              | 24                  |                |                        |                |                    |                  |                         |                       |                              |                              |                              |                              |                              |                              |                              |                  |  |
| 17                                | 2                                                                   | 1          | 2                              |                                 |             |            |                  | 7                      | 1              | 24                  |                |                        |                |                    |                  |                         |                       |                              |                              |                              |                              |                              |                              |                              |                  |  |
| 18                                | 2                                                                   | 1          | 3                              |                                 |             |            |                  | 7                      | 1              | 24                  |                |                        |                |                    |                  |                         |                       |                              |                              |                              |                              |                              |                              |                              |                  |  |
| 19                                | 2                                                                   | 1          | 4                              |                                 |             |            |                  | 7                      | 1              | 24                  |                |                        |                |                    |                  |                         |                       |                              |                              |                              |                              |                              |                              |                              |                  |  |
| 20                                | 2                                                                   | 1          | 5                              |                                 |             |            |                  | 7                      | 1              | 24                  |                |                        |                |                    |                  |                         |                       |                              |                              |                              |                              |                              |                              |                              |                  |  |
| 21                                | 2                                                                   | 2          | 2                              |                                 |             |            |                  | 7                      | 1              | 24                  |                |                        |                |                    | 0                |                         |                       |                              |                              |                              |                              |                              |                              |                              |                  |  |
| 22                                | 2                                                                   | 2          | 3                              |                                 |             |            |                  | 7                      | 1              | 24                  |                |                        |                |                    |                  |                         |                       |                              |                              |                              |                              |                              |                              |                              |                  |  |
| 23                                | 2                                                                   | 2          | 4                              |                                 |             |            |                  | 7                      | 1              | 24                  |                |                        |                |                    |                  |                         |                       |                              |                              |                              |                              |                              |                              |                              |                  |  |
| 24                                | 2                                                                   | 2          | 5                              |                                 |             |            |                  | 7                      | 1              | 24                  |                |                        |                |                    |                  |                         |                       |                              |                              |                              |                              |                              |                              |                              |                  |  |

Sex and Abdominal Status (SAS): 1 = Total Male; 2 = Unfed; 3 = Partly Fed; 4 = Fed; 5 = Gravid/semigravid; 6 = Total Female  
 Body Part (BP): 01 = Whole Adult; 13 = Eggs; 16 = Larvae; 17 = L1; 18 = L2; 19 = L3; 20 = L4; 21 = L1&L2; 22 = L3&L4; 23 = Pupae

Labelling details: First line: FT.SEN.FR  
 Second line: SLC.BP.ST.SID
